# Supplementary material for: Telomere Trimming and DNA Damage as Signatures of High Risk Neuroblastoma
Source: PubMed Central journal article supplement — Neoplasia. 2019 May 23;21(7):689–701. doi: 10.1016/j.neo.2019.04.002 (PMC6535646; doi:10.1016/j.neo.2019.04.002), 2019-05-23
Supplement: mmc1.pdf [file mmc1.pdf]

## Supplemental Figure

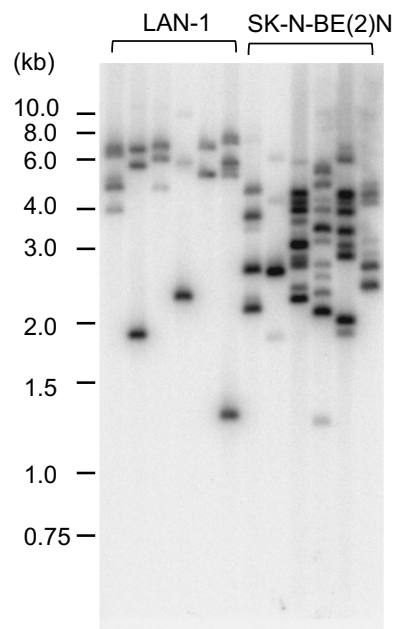

### Supp Fig 1. STELA analysis using alternative PCR polymerases.

LAN-1 and SK-N-BE(2)N DNAs were subjected to STELA using a combination of Pwo and Taq polymerases (10:1). Six amplification reactions for each DNA were performed.
